# Supplementary material for: Phase transformation (cubic to rhombohedral): the effect on the NO2 sensing performance of Zn-doped flower-like In2O3 structures
Source: Royal Society of Chemistry journal article supplement (doi:10.1039/c3ra47467d), 2014-01-01
Supplement: c3ra47467d1.pdf [file c3ra47467d1.pdf]

## Phase transformation (Cubic to Rhombohedral): great effects on NO<sub>2</sub> sensing performance of Zn-doped flower-like In<sub>2</sub>O<sub>3</sub> structures

Pei Li, Huiqing Fan\*, Yu Cai, Mengmeng Xu, Changbai Long, Mengmeng Li,

Shenhui Lei, Xinwei Zou

### Supplemental Figures

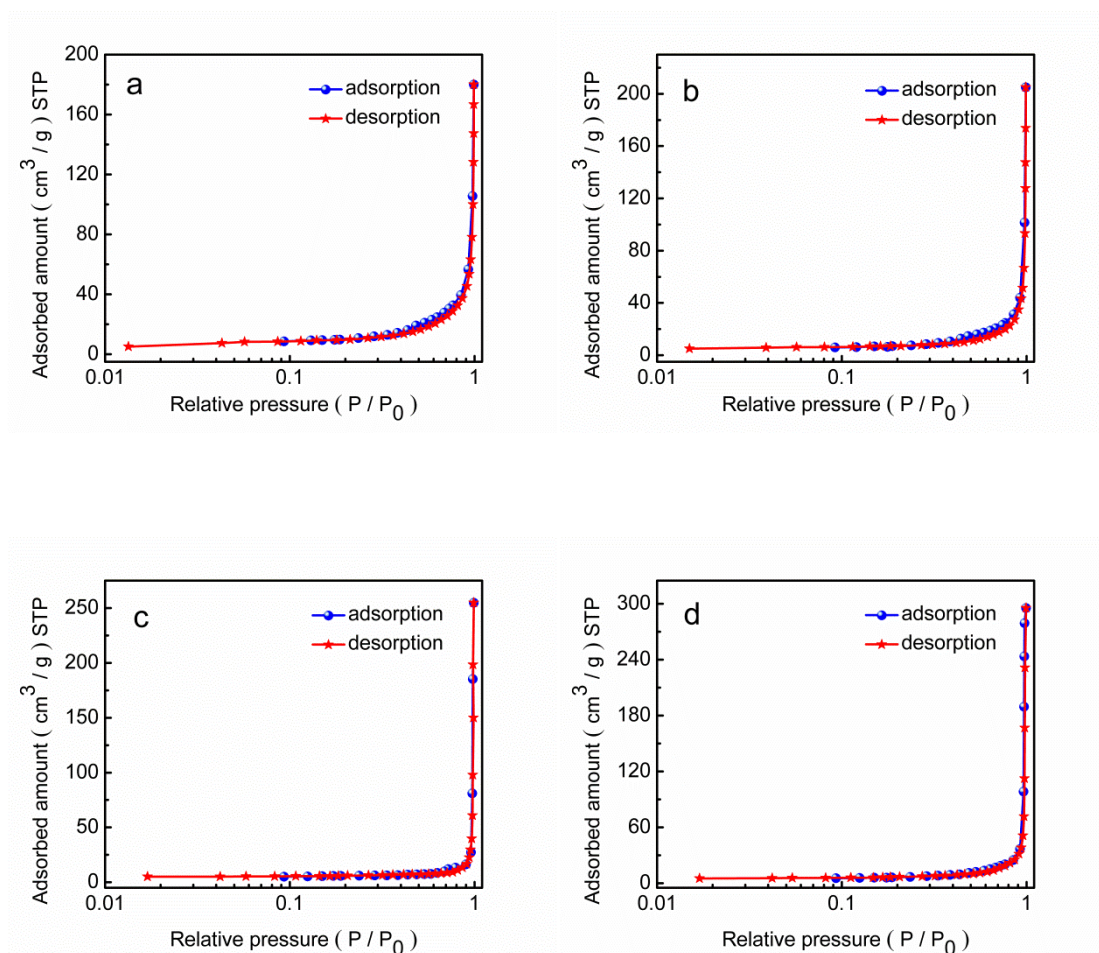

**Supplemental Fig.** N<sub>2</sub> adsorption/desorption curves of (a) S2, (b) S3, (c) S4 and (d) S6.
